# Supplementary material for: Evolution of the atomic and electronic structures of CuO clusters: a comprehensive study using the DFT approach
Source: Royal Society of Chemistry journal article supplement (doi:10.1039/d3cp06235j), 2024-01-01
Supplement: d3cp06235j1.pdf [file d3cp06235j1.pdf]

## Supporting Information

### Evolution of the Atomic and Electronic Structures of CuO Clusters: A Comprehensive Study Using DFT Approach

Soumitra Das, Sandeep Nigam, Pramod Sharma, Chiranjib Majumder

*Chemistry Division, Bhabha Atomic Research Centre, Mumbai  
Homi Bhabha National Institute (HBNI), Mumbai*

**Table S1:** Relative energy of different isomers of  $(\text{CuO})_n$  clusters ( $n=1-12$ ) using PBE functional

| CuO cluster      | Relative energy of different isomeric structure (in eV)                               |      |                                                                                     |      |    |      |    |      |
|------------------|---------------------------------------------------------------------------------------|------|-------------------------------------------------------------------------------------|------|----|------|----|------|
| CuO              |      |      |                                                                                     |      |    |      |    |      |
|                  | 1a                                                                                    | 0.00 |                                                                                     |      |    |      |    |      |
| $(\text{CuO})_2$ |     |      |   |      |    |      |    |      |
|                  | 2a                                                                                    | 0.00 | 2b                                                                                  | 0.01 |    |      |    |      |
| $(\text{CuO})_3$ |    |      |  |      |    |      |    |      |
|                  | 3a                                                                                    | 0.00 | 3b                                                                                  | 1.29 |    |      |    |      |
| $(\text{CuO})_4$ |    |      |                                                                                     |      |    |      |    |      |
|                  |    |      |                                                                                     |      |    |      |    |      |
|                  |   |      |                                                                                     |      |    |      |    |      |
|                  |  |      |                                                                                     |      |    |      |    |      |
|                  | 4a                                                                                    | 0.00 | 4b                                                                                  | 1.54 | 4c | 1.56 | 4d | 2.49 |

|                                                                                     |                                                                                    |                                                                                     |                                                                                      |                                                                                      |                                                                                       |             |             |             |
|-------------------------------------------------------------------------------------|------------------------------------------------------------------------------------|-------------------------------------------------------------------------------------|--------------------------------------------------------------------------------------|--------------------------------------------------------------------------------------|---------------------------------------------------------------------------------------|-------------|-------------|-------------|
| $(\text{CuO})_5$                                                                    | 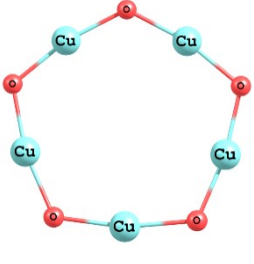  |    |    |   |                                                                                       |             |             |             |
|                                                                                     | 5a                                                                                 | <b>0.00</b>                                                                         | 5b                                                                                   | <b>0.18</b>                                                                          | 5c                                                                                    | <b>0.74</b> | 5d          | <b>2.59</b> |
| $(\text{CuO})_6$                                                                    |   |    |    |   |                                                                                       |             |             |             |
|                                                                                     | 6a                                                                                 | <b>0.00</b>                                                                         | 6b                                                                                   | <b>0.07</b>                                                                          | 6c                                                                                    | <b>0.35</b> | 6d          | <b>0.81</b> |
|                                                                                     |  |   |                                                                                      |                                                                                      |                                                                                       |             |             |             |
|                                                                                     | 6e                                                                                 | <b>1.14</b>                                                                         | 6f                                                                                   | <b>1.75</b>                                                                          |                                                                                       |             |             |             |
|                                                                                     | $(\text{CuO})_7$                                                                   |  |   |  |  |             |             |             |
|                                                                                     |                                                                                    | 7a                                                                                  | <b>0.00</b>                                                                          | 7b                                                                                   | <b>0.04</b>                                                                           | 7c          | <b>0.21</b> | 7d          |
|  |                                                                                    |  |  |                                                                                      |                                                                                       |             |             |             |
| 7e                                                                                  |                                                                                    | <b>0.65</b>                                                                         | 7f                                                                                   | <b>0.66</b>                                                                          | 7g                                                                                    | <b>1.46</b> |             |             |
| $(\text{CuO})_8$                                                                    |                                                                                    |                                                                                     |   |  |  |             |             |             |
|                                                                                     |                                                                                    |                                                                                     |                                                                                      |                                                                                      |                                                                                       |             |             |             |
|                                                                                     |                                                                                    |                                                                                     |                                                                                      |                                                                                      |                                                                                       |             |             |             |
|                                                                                     |                                                                                    |                                                                                     |                                                                                      |                                                                                      |                                                                                       |             |             |             |

|                           |                                                                                     |                                                                                     |                                                                                      |                                                                                       |     |             |     |             |
|---------------------------|-------------------------------------------------------------------------------------|-------------------------------------------------------------------------------------|--------------------------------------------------------------------------------------|---------------------------------------------------------------------------------------|-----|-------------|-----|-------------|
|                           | 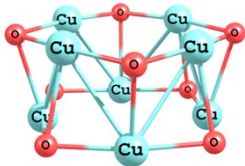   |                                                                                     |                                                                                      |                                                                                       |     |             |     |             |
|                           | 8a                                                                                  | <b>0.00</b>                                                                         | 8b                                                                                   | <b>0.73</b>                                                                           | 8c  | <b>0.76</b> | 8d  | <b>1.08</b> |
|                           |    |                                                                                     |                                                                                      |                                                                                       |     |             |     |             |
|                           | 8e                                                                                  | <b>3.21</b>                                                                         |                                                                                      |                                                                                       |     |             |     |             |
| <b>(CuO)<sub>9</sub></b>  |   |   |   |   |     |             |     |             |
|                           | 9a                                                                                  | <b>0.00</b>                                                                         | 9b                                                                                   | <b>0.44</b>                                                                           | 9c  | <b>1.15</b> | 9d  | <b>1.33</b> |
| <b>(CuO)<sub>10</sub></b> |  |  |  |  |     |             |     |             |
|                           | 10a                                                                                 | <b>0.00</b>                                                                         | 10b                                                                                  | <b>0.16</b>                                                                           | 10c | <b>0.36</b> | 10d | <b>0.94</b> |
|                           |  |  |                                                                                      |                                                                                       |     |             |     |             |
|                           | 10e                                                                                 | <b>1.33</b>                                                                         | 10f                                                                                  | <b>2.09</b>                                                                           |     |             |     |             |

|                           |                                                                                   |                                                                                    |                                                                                    |                                                                                      |                                                                                       |             |             |             |             |
|---------------------------|-----------------------------------------------------------------------------------|------------------------------------------------------------------------------------|------------------------------------------------------------------------------------|--------------------------------------------------------------------------------------|---------------------------------------------------------------------------------------|-------------|-------------|-------------|-------------|
| <b>(CuO)<sub>11</sub></b> | 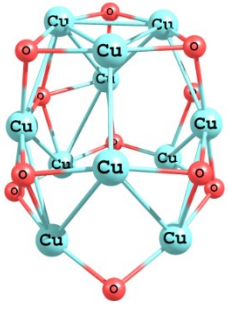 |   |  |   |                                                                                       |             |             |             |             |
|                           | 11a                                                                               | <b>0.00</b>                                                                        | 11b                                                                                | <b>1.08</b>                                                                          | 11c                                                                                   | <b>1.47</b> | 11d         | <b>1.51</b> |             |
|                           |  |   |  |                                                                                      |                                                                                       |             |             |             |             |
|                           | 11e                                                                               | <b>1.89</b>                                                                        | 11f                                                                                | <b>1.98</b>                                                                          | 11g                                                                                   | <b>2.4</b>  |             |             |             |
|                           | <b>(CuO)<sub>12</sub></b>                                                         |  |  |  |  |             |             |             |             |
|                           |                                                                                   | 12a                                                                                | <b>0.00</b>                                                                        | 12b                                                                                  | <b>0.93</b>                                                                           | 12c         | <b>2.00</b> | 12d         | <b>3.82</b> |

**Table S2:** Geometric parameters (Cu-O and Cu-Cu interatomic distances and Cu-O-Cu bond angle) of the lowest energy isomers of (CuO)<sub>n</sub> clusters (n=1-12) and bulk CuO using PBE functional.

| Cluster size (n) | PBE method                    |             |                               |             | Average Cu-O-Cu bond angle (degree) |
|------------------|-------------------------------|-------------|-------------------------------|-------------|-------------------------------------|
|                  | Cu-O                          |             | Cu-Cu                         |             |                                     |
|                  | Avg. Interatomic distance (Å) | No of bonds | Avg. Interatomic distance (Å) | No of bonds |                                     |
| <b>1</b>         | 1.70                          | 1           |                               |             |                                     |
| <b>2</b>         | 1.84                          | 4           | 2.30                          | 1           | 77.3                                |
| <b>3</b>         | 1.80                          | 6           | 2.46                          | 3           | 86.7                                |
| <b>4</b>         | 1.75                          | 8           | 2.75                          | 4           | 104.8                               |
| <b>5</b>         | 1.74                          | 10          | 2.98                          | 5           | 119.9                               |
| <b>6</b>         | 1.73                          | 12          | 3.15                          | *           | 130.4                               |
| <b>7</b>         | 1.72                          | 14          | 3.18                          | *           | 136.3                               |
| <b>8</b>         | 1.95                          | 24          | 2.58, 2.82                    | 16          | 81.8, 101.9                         |
| <b>9</b>         | 1.96                          | 30          | 2.53, 3.50                    | 18          | 85.2, 112.5                         |
| <b>10</b>        | 1.91                          | 30          | 2.54                          | 10          | 83.3, 94.4, 106.5, 113.2, 118.2     |
| <b>11</b>        | 1.95                          | 34          | 2.62                          | 22          | 84.3, 96.5, 102.3, 125.6, 140.3     |
| <b>12</b>        | 1.83, 1.89, 2.01              | 40          | 2.64, 2.75                    | 24          | 97.4, 124.6                         |
| <b>Bulk</b>      | 1.96                          | 4           | 2.63                          | 4           | 102.0, 119.0                        |

\* Cu-Cu interatomic distance up to 3 Å is considered as a bond

**Table S3:** Comparative results (present calculation and reported values) of bond length and binding energy per atom of dimer and bulk species.

| Species               | Bond length (Å)           | Binding energy /atom (eV) |
|-----------------------|---------------------------|---------------------------|
| Cu <sub>2</sub> dimer | 2.24* (Cu-Cu)             | 0.94 *                    |
|                       | 2.22 <sup>1</sup> (Cu-Cu) | 1.03 <sup>2</sup>         |
| Cu bulk               | 2.56 * (Cu-Cu)            | 3.44 *                    |
|                       | 2.56 <sup>2</sup> (Cu-Cu) | 3.50 <sup>3</sup>         |
| CuO Monomer           | 1.73* (Cu-O)              | 1.41 *                    |
|                       | 1.72 <sup>4</sup> (Cu-O)  | 1.22 <sup>4</sup>         |
| CuO bulk              | 1.96 * (Cu-O)             | 3.77 *                    |

\* Present work using hybrid method

(1) *J. Chem. Phys.* 1987, **86**, 1715 - 1726.

(2) *J. Chem. Phys.* 1978, **68**, 1744 - 1751.

(3) *Phys. Rev. B* 1983, **27**, 2132 - 2144.

(4) *J. Phys. Chem.* 1991, **95**, 3460 – 3463.

(5) *Phys. Rev. B* 2013, **87**, 115111.

**Table S4:** Vibrational frequency obtained for optimised structure of CuO clusters (n=1-12) using GAMESS. No imaginary frequency was obtained for any of the optimised structure of CuO clusters

| <b>Vibrational frequencies (in cm<sup>-1</sup>) of optimised structure of neutral CuO clusters</b> |                          |                          |                          |                          |                          |
|----------------------------------------------------------------------------------------------------|--------------------------|--------------------------|--------------------------|--------------------------|--------------------------|
| <b>CuO</b>                                                                                         | <b>(CuO)<sub>2</sub></b> | <b>(CuO)<sub>3</sub></b> | <b>(CuO)<sub>4</sub></b> | <b>(CuO)<sub>5</sub></b> | <b>(CuO)<sub>6</sub></b> |
| 37.819                                                                                             | 0.027                    | 21.621                   | 7.612                    | 17.820                   | 11.340                   |
| 33.198                                                                                             | 0.027                    | 0.019                    | 0.019                    | 4.728                    | 3.455                    |
| 0.027                                                                                              | 0.027                    | 0.021                    | 0.021                    | 0.015                    | 0.015                    |
| 0.027                                                                                              | 8.461                    | 0.025                    | 0.025                    | 0.024                    | 0.020                    |
| 0.027                                                                                              | 37.619                   | 19.910                   | 18.482                   | 0.031                    | 0.026                    |
| 582.011                                                                                            | 60.158                   | 40.661                   | 27.698                   | 13.285                   | 4.857                    |
|                                                                                                    | 200.839                  | 57.251                   | 64.632                   | 41.253                   | 12.606                   |
|                                                                                                    | 223.353                  | 116.846                  | 68.806                   | 43.440                   | 21.634                   |
|                                                                                                    | 284.792                  | 135.603                  | 90.719                   | 52.883                   | 24.575                   |
|                                                                                                    | 329.504                  | 142.511                  | 103.698                  | 60.870                   | 29.169                   |
|                                                                                                    | 385.443                  | 166.430                  | 136.769                  | 87.886                   | 45.466                   |
|                                                                                                    | 561.692                  | 194.557                  | 139.951                  | 102.795                  | 49.876                   |
|                                                                                                    |                          | 412.004                  | 160.838                  | 112.968                  | 58.196                   |
|                                                                                                    |                          | 436.067                  | 179.814                  | 118.952                  | 62.590                   |
|                                                                                                    |                          | 468.397                  | 194.533                  | 131.967                  | 76.929                   |
|                                                                                                    |                          | 508.171                  | 224.092                  | 150.508                  | 97.409                   |
|                                                                                                    |                          | 575.227                  | 409.912                  | 169.690                  | 106.171                  |
|                                                                                                    |                          | 589.665                  | 420.543                  | 191.225                  | 110.993                  |
|                                                                                                    |                          |                          | 434.933                  | 230.220                  | 129.653                  |
|                                                                                                    |                          |                          | 515.482                  | 241.827                  | 133.014                  |
|                                                                                                    |                          |                          | 524.801                  | 368.267                  | 147.108                  |
|                                                                                                    |                          |                          | 575.943                  | 389.744                  | 150.821                  |
|                                                                                                    |                          |                          | 599.325                  | 401.741                  | 184.484                  |
|                                                                                                    |                          |                          | 660.205                  | 472.989                  | 192.732                  |
|                                                                                                    |                          |                          |                          | 473.867                  | 216.491                  |
|                                                                                                    |                          |                          |                          | 597.112                  | 235.948                  |
|                                                                                                    |                          |                          |                          | 621.377                  | 241.007                  |
|                                                                                                    |                          |                          |                          | 665.977                  | 246.062                  |
|                                                                                                    |                          |                          |                          | 714.874                  | 334.988                  |
|                                                                                                    |                          |                          |                          | 720.544                  | 339.068                  |
|                                                                                                    |                          |                          |                          |                          | 341.222                  |
|                                                                                                    |                          |                          |                          |                          | 364.528                  |
|                                                                                                    |                          |                          |                          |                          | 409.362                  |
|                                                                                                    |                          |                          |                          |                          | 464.307                  |
|                                                                                                    |                          |                          |                          |                          | 469.085                  |
|                                                                                                    |                          |                          |                          |                          | 644.413                  |
|                                                                                                    |                          |                          |                          |                          | 656.853                  |
|                                                                                                    |                          |                          |                          |                          | 710.171                  |
|                                                                                                    |                          |                          |                          |                          | 735.029                  |
|                                                                                                    |                          |                          |                          |                          | 763.673                  |
|                                                                                                    |                          |                          |                          |                          | 789.557                  |
|                                                                                                    |                          |                          |                          |                          | 794.762                  |

| <b>Vibrational frequencies (in cm<sup>-1</sup>) of optimised structure of neutral CuO clusters</b> |                          |                          |                           |                           |                           |
|----------------------------------------------------------------------------------------------------|--------------------------|--------------------------|---------------------------|---------------------------|---------------------------|
| <b>(CuO)<sub>7</sub></b>                                                                           | <b>(CuO)<sub>8</sub></b> | <b>(CuO)<sub>9</sub></b> | <b>(CuO)<sub>10</sub></b> | <b>(CuO)<sub>11</sub></b> | <b>(CuO)<sub>12</sub></b> |
| 11.340                                                                                             | 47.470                   | 44.901                   | 16.990                    | 0.013                     | 38.313                    |
| 3.455                                                                                              | 22.961                   | 0.007                    | 0.018                     | 0.015                     | 27.242                    |
| 0.015                                                                                              | 0.020                    | 0.014                    | 0.020                     | 0.018                     | 0.019                     |
| 0.020                                                                                              | 0.021                    | 0.019                    | 0.025                     | 11.132                    | 0.019                     |
| 0.026                                                                                              | 0.022                    | 27.680                   | 2.990                     | 35.494                    | 0.020                     |
| 4.857                                                                                              | 14.228                   | 46.510                   | 26.063                    | 40.510                    | 26.219                    |
| 12.606                                                                                             | 52.103                   | 71.793                   | 36.745                    | 63.644                    | 56.677                    |
| 21.634                                                                                             | 69.629                   | 85.237                   | 43.604                    | 73.592                    | 57.140                    |
| 24.575                                                                                             | 79.671                   | 100.674                  | 65.243                    | 78.461                    | 70.917                    |
| 29.169                                                                                             | 88.008                   | 112.015                  | 77.280                    | 91.448                    | 87.534                    |
| 45.466                                                                                             | 99.926                   | 118.999                  | 83.755                    | 97.810                    | 94.823                    |
| 49.876                                                                                             | 107.144                  | 125.997                  | 90.239                    | 106.935                   | 97.628                    |
| 58.196                                                                                             | 119.628                  | 137.448                  | 96.138                    | 119.387                   | 100.056                   |
| 62.590                                                                                             | 135.323                  | 140.994                  | 99.398                    | 122.664                   | 107.461                   |
| 76.929                                                                                             | 141.306                  | 169.080                  | 107.304                   | 129.590                   | 121.644                   |
| 97.409                                                                                             | 146.737                  | 174.604                  | 127.766                   | 131.237                   | 128.968                   |
| 106.171                                                                                            | 167.487                  | 182.697                  | 133.560                   | 145.823                   | 138.077                   |
| 110.993                                                                                            | 178.420                  | 185.495                  | 142.271                   | 155.958                   | 141.409                   |
| 129.653                                                                                            | 183.304                  | 194.903                  | 151.193                   | 165.093                   | 144.705                   |
| 133.014                                                                                            | 191.264                  | 202.934                  | 154.972                   | 167.481                   | 149.497                   |
| 147.108                                                                                            | 198.166                  | 208.029                  | 164.700                   | 176.957                   | 154.864                   |
| 150.821                                                                                            | 223.863                  | 214.836                  | 174.634                   | 179.129                   | 160.180                   |
| 184.484                                                                                            | 227.716                  | 229.059                  | 183.506                   | 184.318                   | 167.060                   |
| 192.732                                                                                            | 234.833                  | 235.659                  | 187.549                   | 198.857                   | 170.265                   |
| 216.491                                                                                            | 248.310                  | 255.368                  | 189.149                   | 208.733                   | 173.906                   |
| 235.948                                                                                            | 255.011                  | 265.111                  | 198.401                   | 212.140                   | 187.970                   |
| 241.007                                                                                            | 256.453                  | 269.582                  | 206.758                   | 220.998                   | 191.624                   |
| 246.062                                                                                            | 271.744                  | 279.502                  | 216.450                   | 226.001                   | 201.340                   |
| 334.988                                                                                            | 290.950                  | 307.545                  | 235.233                   | 232.997                   | 204.823                   |
| 339.068                                                                                            | 306.873                  | 331.508                  | 242.396                   | 242.083                   | 217.080                   |
| 341.222                                                                                            | 316.064                  | 360.229                  | 292.121                   | 250.682                   | 218.900                   |
| 364.528                                                                                            | 342.922                  | 377.069                  | 310.921                   | 259.868                   | 228.621                   |
| 409.362                                                                                            | 416.985                  | 384.649                  | 325.347                   | 269.019                   | 230.582                   |
| 464.307                                                                                            | 428.881                  | 390.283                  | 335.891                   | 270.709                   | 235.247                   |
| 469.085                                                                                            | 438.631                  | 398.764                  | 341.499                   | 279.136                   | 256.694                   |
| 644.413                                                                                            | 443.586                  | 411.544                  | 354.114                   | 333.819                   | 266.687                   |
| 656.853                                                                                            | 451.091                  | 421.905                  | 359.779                   | 346.801                   | 291.789                   |
| 710.171                                                                                            | 467.079                  | 436.697                  | 368.926                   | 372.114                   | 298.432                   |
| 735.029                                                                                            | 473.730                  | 446.529                  | 372.049                   | 382.579                   | 311.183                   |
| 763.673                                                                                            | 491.396                  | 465.207                  | 373.998                   | 393.003                   | 324.530                   |
| 789.557                                                                                            | 525.576                  | 471.836                  | 383.202                   | 408.579                   | 329.432                   |
| 794.762                                                                                            | 535.965                  | 473.530                  | 387.260                   | 412.148                   | 352.662                   |
|                                                                                                    | 547.113                  | 493.421                  | 393.041                   | 419.511                   | 367.180                   |
|                                                                                                    | 548.488                  | 504.251                  | 397.676                   | 425.538                   | 387.249                   |
|                                                                                                    | 566.878                  | 509.220                  | 414.324                   | 432.000                   | 402.247                   |
|                                                                                                    | 567.065                  | 511.358                  | 421.788                   | 436.004                   | 411.353                   |
|                                                                                                    | 572.254                  | 518.647                  | 427.464                   | 445.715                   | 423.373                   |
|                                                                                                    | 577.494                  | 534.734                  | 440.620                   | 454.309                   | 427.614                   |

|  |  |         |         |         |         |
|--|--|---------|---------|---------|---------|
|  |  | 535.735 | 443.287 | 460.394 | 433.651 |
|  |  | 546.038 | 450.595 | 479.063 | 443.326 |
|  |  | 557.112 | 546.567 | 486.726 | 448.221 |
|  |  | 566.969 | 584.626 | 491.006 | 451.406 |
|  |  | 582.528 | 591.593 | 498.188 | 452.432 |
|  |  | 607.779 | 609.263 | 511.492 | 457.147 |
|  |  |         | 618.852 | 519.585 | 466.548 |
|  |  |         | 625.257 | 526.878 | 477.152 |
|  |  |         | 641.406 | 530.158 | 482.584 |
|  |  |         | 653.516 | 537.404 | 492.416 |
|  |  |         | 661.246 | 543.243 | 501.373 |
|  |  |         | 666.364 | 546.178 | 503.425 |
|  |  |         |         | 550.126 | 506.353 |
|  |  |         |         | 562.000 | 526.714 |
|  |  |         |         | 575.496 | 556.601 |
|  |  |         |         | 584.289 | 558.414 |
|  |  |         |         | 587.568 | 564.229 |
|  |  |         |         | 603.637 | 567.468 |
|  |  |         |         |         | 574.879 |
|  |  |         |         |         | 575.986 |
|  |  |         |         |         | 582.890 |
|  |  |         |         |         | 593.033 |
|  |  |         |         |         | 594.449 |
|  |  |         |         |         | 598.686 |



**Table S5:** Optimized structure of neutral, cation and anion of copper oxide clusters  $[(\text{CuO})_n]$ ,  $n=1-12$  using LCAO-MO approach

| Species             | Neutral                                                                             | Cation                                                                              | Anion                                                                                 |
|---------------------|-------------------------------------------------------------------------------------|-------------------------------------------------------------------------------------|---------------------------------------------------------------------------------------|
| $\text{CuO}$        |    |    |    |
| $(\text{CuO})_2$    |    |    |    |
| $(\text{CuO})_3$    |    |    |    |
| $(\text{CuO})_4$    |    |    |    |
| $(\text{CuO})_5$    |    |    |    |
| $(\text{CuO})_6$    |   |   |   |
| $(\text{CuO})_7$    |  |  |  |
| $(\text{CuO})_8$    |  |  |  |
| $(\text{CuO})_9$    |  |  |  |
| $(\text{CuO})_{10}$ |  |  |  |
| $(\text{CuO})_{11}$ |  |  |  |
| $(\text{CuO})_{12}$ |  |  |  |

**Table S6:** Bader Charges of copper atoms in copper oxide clusters (n = 1-12) and in CuO bulk

| <b>Clusters</b>           | <b>q Cu</b> |      |      |      | <b>Average charge</b> |
|---------------------------|-------------|------|------|------|-----------------------|
| <b>CuO</b>                | 0.60        |      |      |      | 0.60                  |
| <b>(CuO)<sub>2</sub></b>  | 0.90        | 0.89 |      |      | 0.89                  |
| <b>(CuO)<sub>3</sub></b>  | 0.86        | 0.94 | 0.87 |      | 0.89                  |
| <b>(CuO)<sub>4</sub></b>  | 1.01        | 0.97 | 1.00 | 1.01 | 1.00                  |
| <b>(CuO)<sub>5</sub></b>  | 0.98        | 0.98 | 1.06 | 1.01 | 1.00                  |
|                           | 0.97        |      |      |      |                       |
| <b>(CuO)<sub>6</sub></b>  | 0.95        | 1.03 | 1.02 | 1.02 | 1.00                  |
|                           | 1.02        | 0.99 |      |      |                       |
| <b>(CuO)<sub>7</sub></b>  | 1.00        | 1.01 | 1.02 | 1.03 | 1.02                  |
|                           | 1.03        | 1.02 | 1.03 |      |                       |
| <b>(CuO)<sub>8</sub></b>  | 1.10        | 1.11 | 1.11 | 1.12 | 1.11                  |
|                           | 1.11        | 1.10 | 1.09 | 1.10 |                       |
| <b>(CuO)<sub>9</sub></b>  | 1.07        | 1.03 | 1.09 | 1.15 | 1.11                  |
|                           | 1.07        | 1.10 | 1.07 | 1.24 |                       |
|                           | 1.14        |      |      |      |                       |
| <b>(CuO)<sub>10</sub></b> | 1.14        | 1.12 | 1.13 | 1.11 | 1.12                  |
|                           | 1.12        | 1.10 | 1.12 | 1.12 |                       |
|                           | 1.12        | 1.14 |      |      |                       |
| <b>(CuO)<sub>11</sub></b> | 1.08        | 1.09 | 0.78 | 1.34 | 1.07                  |
|                           | 1.36        | 1.11 | 1.23 | 1.05 |                       |
|                           | 0.76        | 0.93 | 1.04 |      |                       |
| <b>(CuO)<sub>12</sub></b> | 1.23        | 1.21 | 1.11 | 1.13 | 1.16                  |
|                           | 1.14        | 1.22 | 1.14 | 1.21 |                       |
|                           | 1.15        | 1.12 | 1.13 | 1.15 |                       |
| <b>CuO Bulk</b>           | 1.08        | 1.08 | 1.08 | 1.08 | 1.08                  |

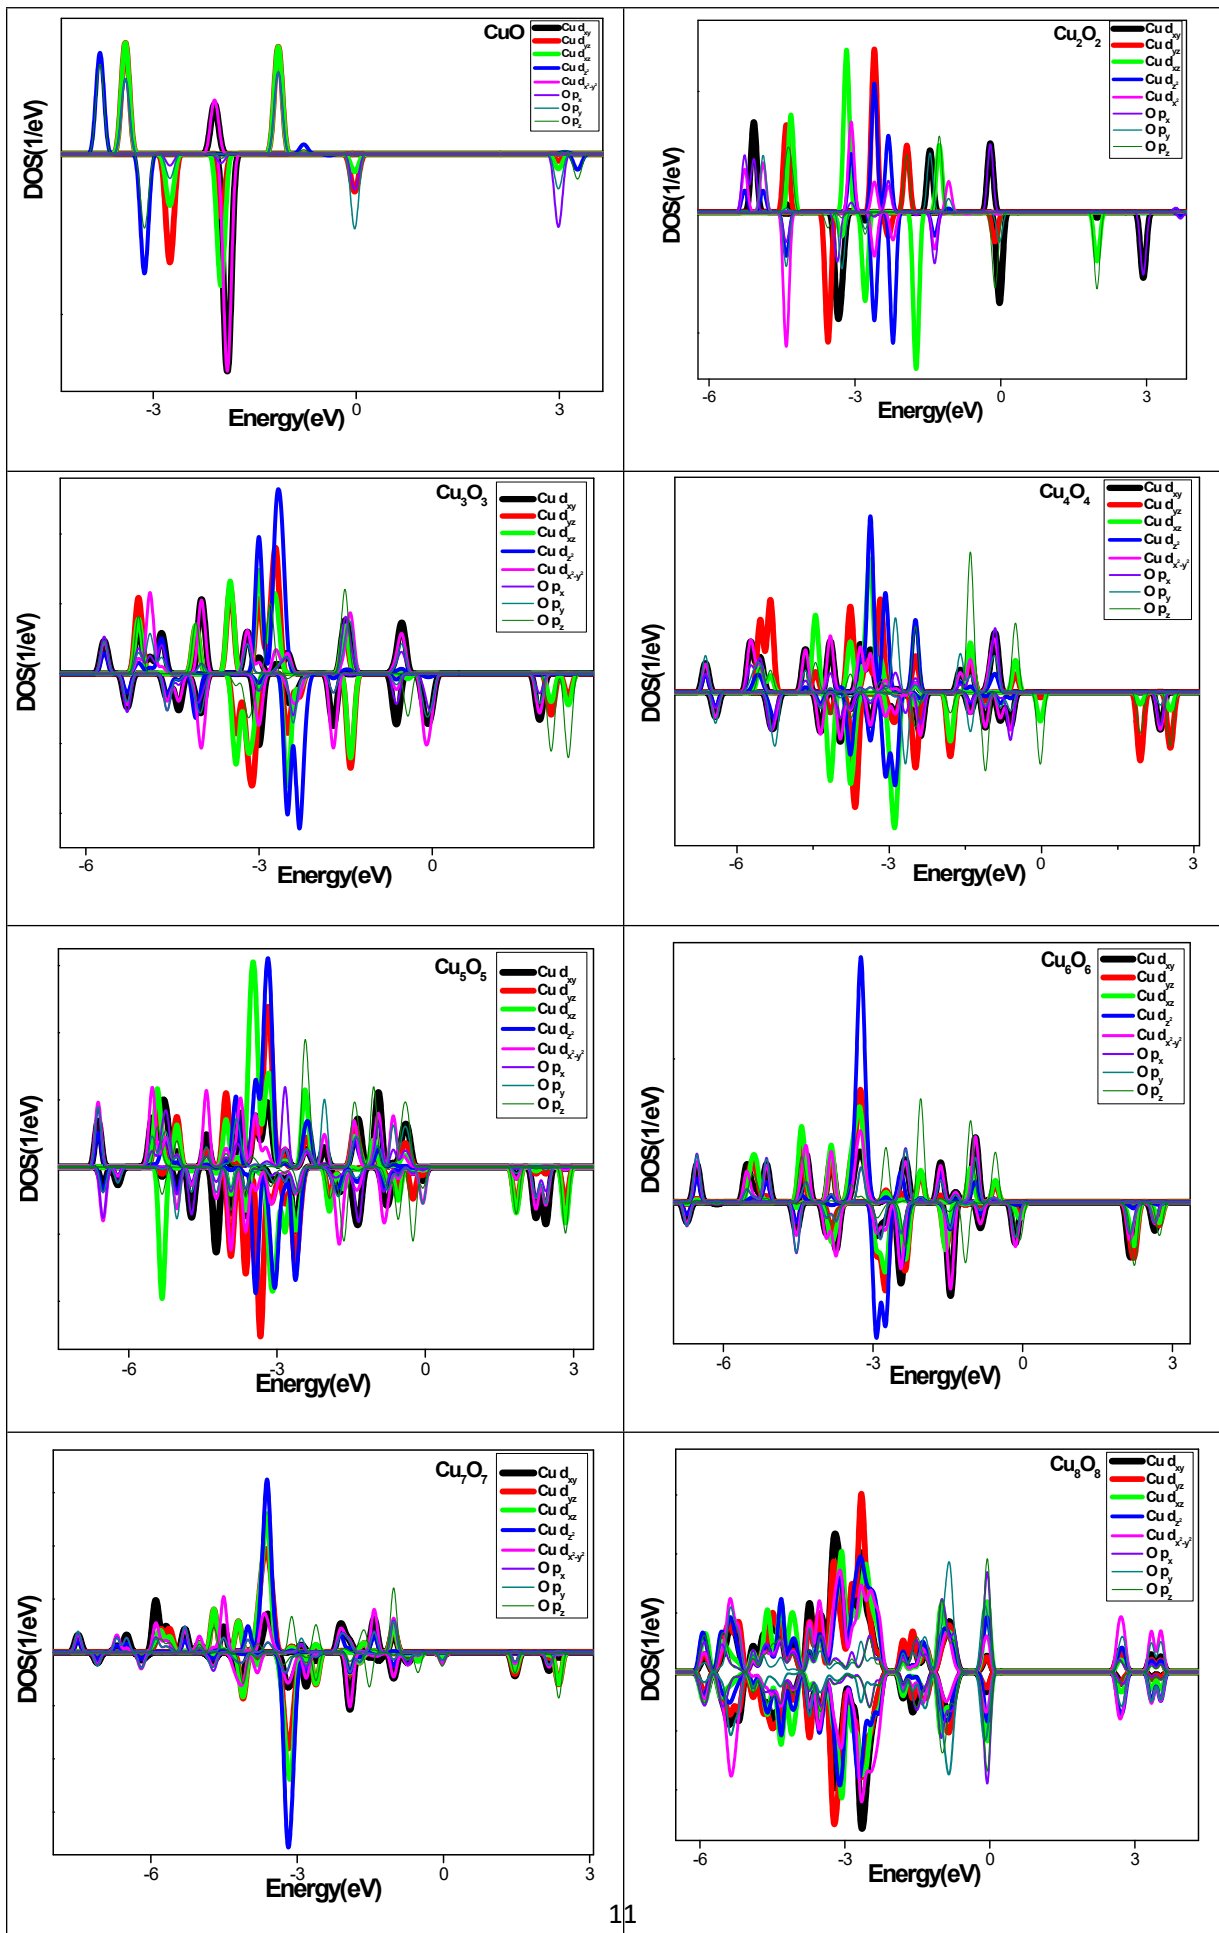

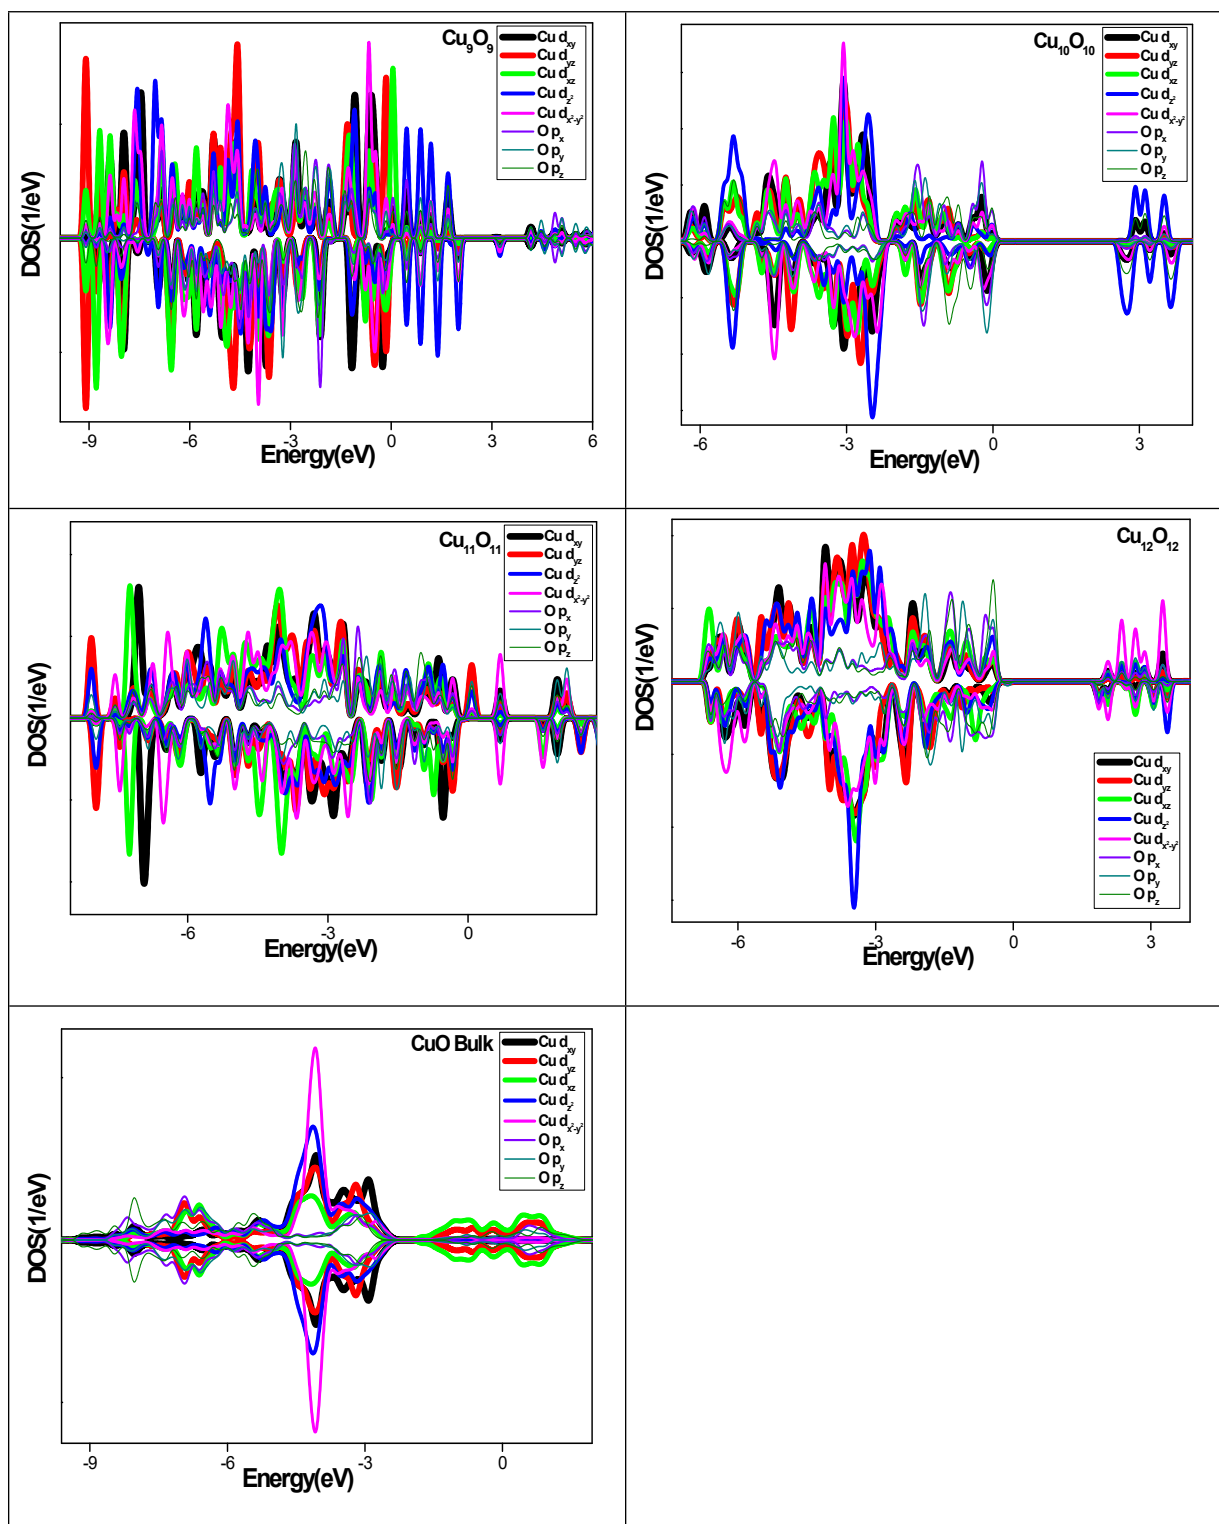

**Figure S1:** Projected density of states (PDOS) as a function of energy of copper oxide clusters  $(\text{CuO})_n$  ( $n=1-12$ ) and CuO bulk using hybrid functional
